# Supplementary material for: Best Molecular Tools to Investigate Coronavirus Diversity in Mammals: A Comparison
Source: MDPI journal article supplement (doi:10.3390/v13101975), 2021-10-01
Supplement: s1 [file s1]

# Supplemental material to: Best molecular tools to investigate coronavirus diversity in mammals: a comparison

Petra Drzewnioková, Francesca Festa, Valentina Panzarin, Davide Lelli, Ana Moreno, Barbara Zecchin, Paola De Benedictis and Stefania Leopardi

**Table S1.** Complementarity of primers with *Alfacoronavirus* sequences. The primers that did not bind to the template in *in silico* analyses are underlined (\*the mismatches were present within the 3 bp of 3' end of primer). Primer sets where at least one primer had no mismatch with the template sequence are in **bold**.

| Species                           | Subspecies              | Isolate                          | Accession No. | Hu-F     | Hu-R     | Chu11-F1 | Chu11-R1 | Chu06-R1  | Chu06-R2  | Poon-F    | Poon-R    | DeSouzaLuna-F1+2 | DeSouzaLuna-R1+2+3 | DeSouzaLuna-F3+4 | DeSouzaLuna-R4 | Holbrook-F1 | Holbrook-R1+2 | Holbrook-F2+3 | Xiu-F1   | Xiu-R    | Xiu-F2    |
|-----------------------------------|-------------------------|----------------------------------|---------------|----------|----------|----------|----------|-----------|-----------|-----------|-----------|------------------|--------------------|------------------|----------------|-------------|---------------|---------------|----------|----------|-----------|
| <i>Alphacoronavirus 1</i>         | TGEV                    | Purdue                           | AJ271965      | <b>0</b> | <b>0</b> | 1        | <b>0</b> | 1         | <u>2*</u> | 1         | 1         | <b>3; 0</b>      | 4; 2; 4            | 4; 6             | 3              | 1           | 0; 2          | 2; 0          | 0        | 1        | 2         |
|                                   | Feline CoV              | Type I<br>C1Je                   | DQ848678      | <b>0</b> | <b>0</b> | 1        | 1        | 3         | <u>4*</u> | 1         | 3         | <b>3; 0</b>      | 4; 2; 4            | 4; 6             | 3              | 1           | 1; 3          | <b>2; 0</b>   | 1        | 2        | 2         |
|                                   |                         | Type II<br>FIP virus WSU 79-1146 | AY994055      | <b>0</b> | <b>0</b> | <b>0</b> | <b>0</b> | 1         | <u>2*</u> | 1         | 1         | 3; 1             | 4; 2; 4            | 4; 6             | 3              | <b>0</b>    | <b>0; 2</b>   | <b>2; 0</b>   | <b>0</b> | 1        | 2         |
|                                   | Porcine respiratory CoV | ISU-1                            | DQ811787      | <b>0</b> | <b>0</b> | 1        | <b>0</b> | 1         | <u>2*</u> | 1         | 1         | <b>3; 0</b>      | 4; 2; 4            | 3; 5             | 3              | 1           | <b>0; 2</b>   | <b>2; 0</b>   | <b>0</b> | 1        | 2         |
|                                   | Canine CoV              | Type I<br>23/03                  | KP849472      | <b>0</b> | <b>0</b> | 1        | 1        | 1         | <u>2*</u> | 1         | 1         | <b>3; 0</b>      | 4; 2; 4            | 4; 6             | 4              | 1           | <b>0; 2</b>   | <b>2; 0</b>   | 1        | 2        | 2         |
|                                   |                         | Type II<br>NTU336/F/2008         | GQ477367      | <b>0</b> | <b>0</b> | 1        | <b>0</b> | 1         | <u>2*</u> | 1         | 1         | 3; 1             | 4; 2; 4            | 4; 6             | 3              | 1           | <b>0; 2</b>   | <b>2; 0</b>   | <b>0</b> | <b>0</b> | 2         |
|                                   |                         | Type IIa<br>CB/05                | KP981644      | <b>0</b> | <b>0</b> | 1        | <b>0</b> | 2         | <u>3*</u> | 1         | 2         | <b>3; 0</b>      | 3; 2; 3            | 4; 6             | 4              | 1           | <b>0; 2</b>   | <b>2; 0</b>   | <b>0</b> | 1        | 2         |
|                                   |                         | Type IIb<br>174/06, type IIb     | EU856362      | <b>0</b> | <b>0</b> | 1        | <b>0</b> | 2         | <u>3*</u> | 1         | 2         | <b>3; 0</b>      | 3; 2; 3            | 4; 6             | 4              | 1           | <b>0; 2</b>   | <b>2; 0</b>   | <b>0</b> | 1        | 2         |
|                                   | Bat coronavirus HKU10   | 183A                             | NC_018871     | <b>0</b> | 1        | <b>0</b> | <b>0</b> | 2         | <u>3*</u> | 1         | 2         | <u>2*, 3*</u>    | 3; 2; 3            | 2; 4             | <u>5</u>       | 1           | <b>0; 2</b>   | <b>0; 0</b>   | <b>0</b> | 2        | 2         |
|                                   | Bat coronavirus CDPHE15 | bat/USA/CDPHE15/2006             | NC_022103     | <b>0</b> | 1        | <b>0</b> | <b>0</b> | 4         | <u>5*</u> | 2         | 4         | 3; 2             | 7; 5; 3            | 4; 5             | <u>6</u>       | 1           | 2; 4          | <b>0; 0</b>   | <b>0</b> | 1        | 3         |
|                                   | Human coronavirus 229E  | KW2E-F151/Hipcf.rub/GHA/2011     | KT253269      | <b>0</b> | 1        | <b>0</b> | <b>0</b> | 3         | <u>3*</u> | <b>0</b>  | 3         | 2; 1             | 4; 1; 4            | 3; 5             | 3              | 1           | 1; 3          | <b>0; 0</b>   | <b>0</b> | 2        | 1         |
|                                   |                         | Human coronavirus 229E           | NC_002645     | 1        | <b>0</b> | 1        | <b>0</b> | 2         | <u>2*</u> | 1         | 2         | <b>3; 0</b>      | <b>3; 0; 5</b>     | 4; 6             | 3              | 1           | 1; 3          | <b>0; 0</b>   | 2        | <b>0</b> | 2         |
|                                   |                         | camel/Riyadh/Ry141/2015          | NC_028752     | <b>0</b> | <b>0</b> | 1        | <b>0</b> | 1         | <u>2*</u> | 1         | 1         | 3; 1             | <b>3; 0; 5</b>     | 4; 6             | 2              | 1           | <b>0; 2</b>   | <b>0; 0</b>   | 2        | <b>0</b> | 2         |
|                                   | Human coronavirus NL63  | NL63 Amsterdam I                 | AY567487      | <b>0</b> | 1        | 1        | 1        | 2         | <u>3*</u> | 3         | <u>3*</u> | <b>0; 3</b>      | 3; 1; 5            | <b>2; 0</b>      | 3              | 1           | 1; 3          | <b>0; 0</b>   | <b>0</b> | 3        | 2         |
| Lucheng Rn rat coronavirus        |                         | Lucheng-19                       | NC_032730     | <b>0</b> | <b>0</b> | 1        | <b>0</b> | 1         | <u>2*</u> | 1         | 1         | 2; 2             | 4; 2; 4            | 3; 3             | 2              | 1           | <b>0; 2</b>   | <b>2; 0</b>   | 1        | <b>0</b> | 2         |
| Miniopterus bat coronavirus 1     | B                       | AFCD307                          | NC_010436     | 1        | 1        | 1        | 1        | 3         | 3         | 1         | 3         | 3; 2             | 4; 3; 3            | 4; 6             | 4              | 1           | 1; 3          | <b>0; 0</b>   | 2        | 1        | 2         |
|                                   | A                       | AFCD62                           | NC_010437     | 1        | <b>0</b> | 1        | 1        | 2         | 2         | 2         | 2         | 2; 2             | 5; 3; 4            | 3; 3             | 4              | 1           | 2; 4          | <b>0; 0</b>   | 1        | <b>0</b> | 3         |
| Miniopterus bat coronavirus HKU8  |                         | AFCD77/08/05 Mm                  | NC_010438     | <b>0</b> | 1        | <b>0</b> | 1        | 2         | 1         | 2         | 2         | <u>2*, 4*</u>    | 2; 1; 4            | 2; 4             | 3              | 1           | <b>0; 2</b>   | <b>2; 0</b>   | 2        | 1        | 1         |
| Mink coronavirus 1                |                         | WD1127                           | NC_023760     | <b>0</b> | <b>0</b> | <b>0</b> | 1        | 2         | 2         | 3         | 2         | 0; 3             | 5; 3; 4            | 2; 1             | <u>5</u>       | 2           | <b>0; 2</b>   | 3; 1          | <b>0</b> | 2        | 2         |
| Myotis ricketti alphaCoV          |                         | Sax-2011                         | NC_028811     | <b>0</b> | 1        | <b>0</b> | <b>0</b> | <u>6*</u> | <u>7*</u> | <b>0</b>  | <u>6*</u> | 1; 2             | 6; 5; 2            | 1; 3             | <u>7</u>       | 1           | 2; 4          | <b>2; 0</b>   | 2        | 1        | 1         |
| NL-63-related bat coronavirus     |                         | BtKYNL63-9b                      | NC_048216     | <b>0</b> | 1        | <b>0</b> | <b>0</b> | 2         | <u>4*</u> | 2         | <u>3*</u> | <u>2*, 3*</u>    | 3; 2; 3            | 3; 5             | 4              | 1           | <b>0; 2</b>   | <b>0; 0</b>   | 2        | 1        | 1         |
| Nyctalus velutinus alphaCoV       |                         | SC-2013                          | NC_028833     | <b>0</b> | 1        | <b>0</b> | 1        | 4         | <u>5*</u> | 1         | <u>5*</u> | <u>2*, 3*</u>    | 4; 3; 2            | 2; 4             | <u>5</u>       | 1           | 1; 3          | <b>0; 0</b>   | <b>0</b> | 1        | 2         |
| Pipistrellus khulii coronavirus   |                         | P.kuhlil/Italy/3398-19/2015      | NC_046964     | <b>0</b> | <b>0</b> | <b>0</b> | 1        | <u>5</u>  | <u>7*</u> | 2         | <u>6*</u> | <u>2*, 3*</u>    | 6; 5; 1            | 2; 4             | <u>9</u>       | 1           | 3; 5          | <b>0; 0</b>   | 1        | 1        | 1         |
| Porcine epidemic diarrhea virus   |                         | CV777                            | NC_003436     | <b>0</b> | <b>0</b> | 1        | 1        | 1         | <u>3*</u> | <u>4*</u> | <u>2*</u> | <u>1*, 4*</u>    | 3; 0; 5            | <u>3*, 4*</u>    | 4              | 1           | <b>0; 2</b>   | 1; 1          | <b>0</b> | 1        | <u>3*</u> |
| Rhinolophus ferrumequinum alhaCoV |                         | HuB-2013                         | NC_028814     | <b>0</b> | <b>0</b> | 1        | 1        | 2         | 3         | 3         | <u>3*</u> | <u>4*, 2*</u>    | 5; 3; 4            | <u>6; 7</u>      | <u>5</u>       | 2           | 2; 4          | 3; 1          | <b>0</b> | 2        | 4         |
| Rhinophilus bat coronavirus HKU2  |                         | HKU2/HK/46/2006                  | EF203065      | <b>0</b> | 1        | 1        | <b>0</b> | 2         | <u>4*</u> | 3         | <u>3*</u> | 2; 3             | 3; 2; 3            | 3; 3             | <u>5</u>       | 1           | <b>0; 2</b>   | <b>0; 0</b>   | 1        | 1        | 2         |
| Scatophilus bat coronavirus       |                         | 512/2005                         | NC_009657     | <b>0</b> | 1        | 1        | 1        | 2         | <u>4*</u> | 2         | <u>3*</u> | 2; 2             | 4; 1; 5            | 3; 5             | <u>5</u>       | 1           | <b>0; 2</b>   | <b>0; 0</b>   | 1        | 2        | 1         |
| Sorex araneus coronavirus         |                         | Shrew-CoV/Tibet2014              | NC_046955     | <b>0</b> | 1        | <b>0</b> | <b>0</b> | 3         | <u>4*</u> | 3         | 3         | <u>2*, 4*</u>    | 4; 3; 3            | 4; 4             | 4              | 1           | 1; 3          | <b>0; 0</b>   | 1        | 2        | 2         |
| Suncus murinus coronavirus        |                         | Xingguo-101                      | NC_035191     | <b>0</b> | <b>0</b> | 2        | 1        | <u>5*</u> | <u>7*</u> | 4         | <u>6*</u> | 2; 1             | <u>3*, 5*, 7*</u>  | 5; 3             | <u>8</u>       | 1           | <b>2; 0</b>   | <b>2; 0</b>   | <b>0</b> | <b>0</b> | <b>3</b>  |

**Table S2.** Complementarity of primers with *Betacoronavirus* sequences. The primers that did not bind to the template in *in silico* analyses are underlined (\*the mismatches were present within the 3 bp of 3' end of primer). Primer sets where at least one primer had no mismatch with the template sequence are in **bold**.

| Species                                  | Subspecies                                       | Isolate                        | Accession No. | Hu-F     | Hu-R     | Chu11-F1 | Chu11-R1 | Chu06-R1 | Chu06-R2  | Poon-F    | Poon-R    | DeSouzaLuna-F1+2 | DeSouzaLuna-R1+2+3 | DeSouzaLuna-F3+4 | DeSouzaLuna-R4 | Holbrook-F1 | Holbrook-R1+2 | Holbrook-F2+3 | Xiu-F1   | Xiu-R    | Xiu-F2   |
|------------------------------------------|--------------------------------------------------|--------------------------------|---------------|----------|----------|----------|----------|----------|-----------|-----------|-----------|------------------|--------------------|------------------|----------------|-------------|---------------|---------------|----------|----------|----------|
| <i>Betacoronavirus 1</i>                 | Human coronavirus OC43                           | ATCC VR-759                    | AY585228      | <b>0</b> | <b>0</b> | <b>0</b> | <b>0</b> | 4        | <u>7*</u> | 1         | 4         | <b>0; 3</b>      | 1; 4; 5            | <b>0; 2</b>      | <u>6</u>       | 1           | <b>2; 0</b>   | <b>0; 2*</b>  | <b>0</b> | 1        | <b>0</b> |
|                                          | Bovine coronavirus                               | Mebus                          | BCU00735      | <b>0</b> | <b>0</b> | <b>0</b> | <b>0</b> | 4        | <u>7*</u> | 1         | 4         | <b>0; 3</b>      | 1; 4; 5            | <b>0; 2</b>      | <u>6</u>       | 1           | <b>2; 0</b>   | <b>0; 2*</b>  | <b>0</b> | 1        | <b>0</b> |
|                                          | Porcine hemagglutinating encephalomyelitis virus | VW572                          | NC_007732     | <b>0</b> | <b>0</b> | 1        | 1        | 4        | <u>7*</u> | 2         | 4         | <b>0; 3</b>      | 1; 4; 5            | 1; 2             | <u>5</u>       | 1           | <b>2; 0</b>   | <b>0; 2*</b>  | 1        | 2        | 1        |
|                                          | Equine coronavirus                               | NC99                           | NC_010327     | <b>0</b> | 1        | <b>0</b> | <b>0</b> | 4        | <u>7*</u> | 1         | 4         | <b>0; 3</b>      | 1; 4; 5            | <b>0; 2</b>      | <u>6</u>       | 1           | <b>2; 0</b>   | <b>0; 2*</b>  | <b>0</b> | 2        | <b>0</b> |
| <i>China Rattus coronavirus HKU24</i>    |                                                  | HKU24-R05005I                  | NC_026011     | <b>0</b> | <b>0</b> | <b>0</b> | 1        | 4        | <u>7*</u> | <u>2*</u> | 4         | 1; 3             | 1; 4; 5            | <u>3*, 5*</u>    | <u>7</u>       | 1           | 3*; 1         | <b>2; 0</b>   | 1        | 2        | 1        |
| <i>Eidolon bat coronavirus C704</i>      |                                                  | Kenya/KY24/2006                | HQ728482      | 1        | <b>0</b> | <b>0</b> | 1        | 4        | <u>7*</u> | <b>0</b>  | 4         | 2; 2             | 2; 3; 7            | 3; 5             | <u>7</u>       | 1           | <b>0; 0</b>   | <b>2; 0</b>   | 1        | 1        | 2        |
| <i>Hedgehog coronavirus 1</i>            |                                                  | ErinaceusCoV/2012-174/GER/2012 | NC_039207     | <b>0</b> | 1        | <b>0</b> | 1        | 2        | <u>4*</u> | 2         | <u>3*</u> | <u>1*, 4*</u>    | 4; 1; 5            | 1; 3             | <u>5</u>       | 1           | <b>0; 2*</b>  | <b>0; 2</b>   | 1        | 1        | 2        |
| <i>Human coronavirus HKU1</i>            |                                                  | HKU1                           | NC_006577     | <b>0</b> | <b>0</b> | <b>0</b> | 1        | 4        | <u>7*</u> | 2         | 4         | <b>0; 3</b>      | 1; 4; 5            | 1; 1             | <u>6</u>       | 1           | <b>0; 2*</b>  | <b>2; 0</b>   | 1        | <b>0</b> | 1        |
| <i>MERS-related coronavirus</i>          | camel/UAE_B21_2015                               | MF598613                       | MF598613      | <b>0</b> | <b>0</b> | <b>0</b> | <b>0</b> | 3        | <u>3*</u> | 2         | 3         | <u>1*, 4*</u>    | 3; 2; 4            | 1; 3             | <u>5</u>       | 4           | <b>0; 0</b>   | <b>0; 2</b>   | 1        | 2        | 2        |
|                                          | HCoV-EMC/2012                                    | NC_019843                      | NC_019843     | <b>0</b> | <b>0</b> | <b>0</b> | <b>0</b> | 3        | <u>3*</u> | 2         | 3         | <u>1*, 4*</u>    | 3; 2; 4            | 1; 3             | <u>5</u>       | 1           | <b>0; 2*</b>  | <b>0; 2</b>   | 1        | 3        | 2        |
| <i>Murine coronavirus</i>                | Rat coronavirus                                  | Rat coronavirus Parker         | FJ938068      | <b>0</b> | <b>0</b> | <b>0</b> | 1        | 4        | <u>7*</u> | <b>0</b>  | 4         | 1; 2             | 1; 4; 5            | 1; 3             | <u>5</u>       | 1           | <b>2; 0</b>   | <b>0; 2*</b>  | 1        | 1        | 1        |
|                                          | Murine hepatitis virus                           | JHM                            | NC_006852     | <b>0</b> | <b>0</b> | <b>0</b> | 1        | <u>5</u> | <u>8*</u> | 1         | <u>5</u>  | 2; 2             | 2; 5; 6            | 3; 3             | <u>6</u>       | 1           | <u>3*, 4*</u> | <b>0; 2*</b>  | 1        | 1        | 2        |
| <i>Myodes coronavirus 2JL14</i>          |                                                  | RtMruf-CoV-2/JL2014            | NC_046954     | 1        | <b>0</b> | 1        | 1        | 4        | <u>7*</u> | 3         | 4         | 1; 2             | 1; 4; 5            | 2; 2             | <u>6</u>       | 1           | <b>0; 2*</b>  | <b>2; 0</b>   | 2        | 2        | 2        |
| <i>Pipistrellus bat coronavirus HKU5</i> |                                                  | HKU5-1 LMH03f                  | NC_009020     | <b>0</b> | 1        | 1        | <b>0</b> | 3        | <u>5*</u> | 3         | <u>4*</u> | <u>2*, 3*</u>    | 4; 3; 3            | 4; 4             | <u>6</u>       | 1           | <b>0; 2*</b>  | 1; 3          | 2        | 1        | 2        |
| <i>Rousettus bat coronavirus HKU9</i>    |                                                  | HKU9-1 BF_005I                 | NC_009021     | 1        | <b>0</b> | <b>0</b> | 1        | 4        | <u>7*</u> | 1         | 4         | 2; 1             | 2; 3; 6            | 4; 4             | <u>7</u>       | 1           | <b>0; 2*</b>  | 3; 1          | 2        | 2        | <b>0</b> |
| <i>SARS-related CoV</i>                  | human CoV                                        | Urbani                         | AY278741      | <b>0</b> | 1        | 1        | <b>0</b> | 2        | 2         | 3         | <u>3*</u> | <b>0; 3</b>      | <b>3; 0; 5</b>     | 2; 1             | 4              | 1           | 1; 3          | <b>0; 0</b>   | 2        | 1        | 2        |
|                                          | palm civet CoV                                   | SZ3/2003                       | AY304486      | <b>0</b> | 1        | 1        | <b>0</b> | 2        | 2         | 3         | <u>3*</u> | <b>0; 3</b>      | <b>3; 0; 5</b>     | 2; 1             | 4              | 1           | 1; 3          | <b>0; 0</b>   | 2        | 1        | 2        |
|                                          | chinese ferret badger CoV                        | CFB/SZ/94/03                   | AY545919      | <b>0</b> | <b>0</b> | 1        | <b>0</b> | 2        | 2         | 3         | <u>3*</u> | <b>0; 3</b>      | <b>3; 0; 5</b>     | 2; 1             | 4              | 1           | 1; 3          | <b>0; 0</b>   | 2        | 1        | 2        |
|                                          | SARS-CoV-2                                       | human/ITA/32898/2020           | MT483878      | <b>0</b> | <b>0</b> | <b>0</b> | 1        | 4        | 4         | 2         | <u>5*</u> | <b>0; 3</b>      | 5; 3; 4            | 1; 1             | <u>5</u>       | 1           | 3; 5          | <b>0; 0</b>   | 1        | <b>0</b> | 1        |
|                                          | Rhinopholus bat CoV                              | Rp3/2004                       | NC_009693     | <b>0</b> | 1        | 1        | <b>0</b> | 2        | 2         | 3         | <u>3*</u> | <b>0; 3</b>      | <b>3; 0; 5</b>     | 2; 1             | <u>5</u>       | 1           | 1; 3          | <b>0; 2*</b>  | 2        | 1        | 2        |
|                                          |                                                  | HKU3-1                         | NC_009694     | <b>0</b> | <b>0</b> | 1        | 1        | 3        | 3         | 3         | <u>4*</u> | <u>3*, 3*</u>    | 4; 1; 4            | 5; 4             | <u>5</u>       | 1           | 2; 4          | <b>0; 2*</b>  | 4        | <b>0</b> | 4        |
|                                          |                                                  | Rf1/2004                       | NC_009695     | <b>0</b> | <b>0</b> | 1        | 1        | 2        | 2         | 3         | <u>3*</u> | <u>2*, 3*</u>    | <b>3; 0; 5</b>     | 4; 3             | 4              | 1           | 1; 3          | <b>0; 2*</b>  | 4        | <b>0</b> | 4        |
|                                          |                                                  | Rm1/2005                       | NC_009696     | <b>0</b> | 1        | 1        | 1        | 2        | 2         | 1         | <u>3*</u> | 1; 2             | <b>3; 0; 5</b>     | 2; 3             | 4              | 1           | 1; 3          | <b>0; 2*</b>  | 2        | 1        | 2        |
| <i>Tylonycteris bat coronavirus HKU4</i> |                                                  | HKU4-1 BO4f                    | NC_009019     | <b>0</b> | 1        | <b>0</b> | <b>0</b> | 3        | <u>4*</u> | 2         | 3         | <u>2*, 4*</u>    | 6; 4; 3            | 3; 5             | 4              | 1           | <b>0; 2*</b>  | 2; 4          | 1        | <b>0</b> | 1        |
| <i>Bat Hp-betacoronavirus</i>            |                                                  | Zhejiang2013                   | NC_025217     | 1        | <b>0</b> | <b>0</b> | <b>0</b> | 3        | <u>4*</u> | 1         | 3         | 1; 3             | 4; 3; 3            | 1; 3             | <u>6</u>       | 1           | <b>0; 2*</b>  | 1; 3          | <b>0</b> | 3        | 1        |

**Table S3.** Complementarity of primers with *Gammacoronavirus* and *Deltacoronavirus* sequences. The primers that did not bind to the template in *in silico* analyses are underlined (\*the mismatches were present within the 3 bp of 3' end of primer). Primer sets where at least one primer had no mismatch with the template sequence are in **bold**.

| Genus  | Species                                 | Isolate            | Accession No. | Hu-F     | Hu-R      | Chu11-F1 | Chu11-R1 | Chu06-R1  | Chu06-R2   | Poon-F | Poon-R    | DeSouzaLuna-F1+2 | DeSouzaLuna-R1+2+3 | DeSouzaLuna-F3+4 | DeSouzaLuna-R4 | Holbrook-F1 | Holbrook-R1+2 | Holbrook-F2+3 | Xiu-F1   | Xiu-R    | Hu-F2    |
|--------|-----------------------------------------|--------------------|---------------|----------|-----------|----------|----------|-----------|------------|--------|-----------|------------------|--------------------|------------------|----------------|-------------|---------------|---------------|----------|----------|----------|
| Delta- | <i>Coronavirus HKU15</i>                |                    | LC216915      | <b>0</b> | <b>0</b>  | <b>0</b> | <b>0</b> | <u>5*</u> | <u>9*</u>  | 2      | <u>6*</u> | <u>3*, 5*</u>    | <u>5*, 4*, 4*</u>  | 4; 6             | <u>8*</u>      | 1           | <b>0; 2</b>   | <b>2*; 0</b>  | 1        | <b>0</b> | 1        |
|        | <i>Bulbul coronavirus HKU11-934</i>     |                    | NC_011547     | <b>0</b> | 1         | 1        | 1        | <u>2*</u> | <u>6*</u>  | 3      | <u>3*</u> | <u>3*, 5*</u>    | 4; 2; 5            | <u>5; 5</u>      | 4              | 1           | <b>0; 2</b>   | <b>2*; 0</b>  | <b>0</b> | 1        | 2        |
|        | <i>Thrush coronavirus HKU12-600</i>     |                    | NC_011549     | <b>0</b> | <b>0</b>  | <b>0</b> | 1        | <u>5*</u> | <u>8*</u>  | 2      | <u>6*</u> | <u>3*, 4*</u>    | 4; 3; 3            | 4; 6             | <u>7</u>       | 1           | <b>0; 2</b>   | <b>2*; 0</b>  | <b>0</b> | 1        | 1        |
|        | <i>Munia coronavirus HKU13-3514</i>     |                    | NC_011550     | <b>0</b> | <b>0</b>  | 2        | <b>0</b> | <u>2*</u> | <u>6*</u>  | 4      | <u>3*</u> | <u>4*, 5*</u>    | 4; 2; 5            | <u>6; 6</u>      | 4              | 1           | <b>0; 2</b>   | 1*; 1*        | <b>0</b> | 1        | 3        |
|        | <i>White-eye coronavirus HKU16</i>      |                    | NC_016991     | <b>0</b> | <b>0</b>  | <b>0</b> | 1        | <u>4*</u> | <u>7*</u>  | 2      | <u>4*</u> | <u>3*, 5*</u>    | <u>5*, 2*, 5*</u>  | 4; 6             | <u>7*</u>      | 1           | <b>0; 2</b>   | 2*; 1*        | <b>0</b> | 1        | 1        |
|        | <i>Night-heron coronavirus HKU19</i>    |                    | NC_016994     | <b>0</b> | 1         | <b>0</b> | <b>0</b> | <u>3*</u> | <u>5*</u>  | 3      | <u>4*</u> | <u>6*, 7*</u>    | 2; 1; 4            | <u>7; 9</u>      | 4              | <b>0</b>    | <b>0; 2</b>   | <b>2*; 0</b>  | 1        | 1        | 2        |
|        | <i>Wigeon coronavirus HKU20</i>         |                    | NC_016995     | <b>0</b> | 1         | <b>0</b> | <b>0</b> | <u>4*</u> | <u>9*</u>  | 2      | <u>5*</u> | 3; 5             | <u>6*, 4*, 6*</u>  | <u>5; 5</u>      | <u>8*</u>      | 1           | 1; 3          | <b>2*; 0</b>  | 1        | <b>0</b> | 1        |
|        | <i>Common moorhen coronavirus HKU21</i> |                    | NC_016996     | <b>0</b> | 1         | <b>0</b> | 1        | <u>5*</u> | <u>9*</u>  | 1      | <u>6*</u> | 3; 6             | <u>7*, 5*, 5*</u>  | 3; 5             | <u>8*</u>      | 1           | 1; 3          | 1*; 1*        | <b>0</b> | 2        | <b>0</b> |
|        | <i>Coronavirus HKU15</i>                |                    | NC_039208     | <b>0</b> | <b>0</b>  | <b>0</b> | <b>0</b> | <u>5*</u> | <u>9*</u>  | 2      | <u>5*</u> | <u>3*, 5*</u>    | <u>5*, 4*, 4*</u>  | 4; 6             | <u>8*</u>      | 1           | <b>0; 2</b>   | <b>2*; 0</b>  | 1        | <b>0</b> | 1        |
| Gamma- | <i>Turkey coronavirus</i>               | TCoV-ATCC          | EU022526      | <b>0</b> | <b>0</b>  | <b>0</b> | <b>0</b> | <u>6*</u> | <u>6</u>   | 2      | <u>7*</u> | 1; 3             | 5; 4; 1            | 1; 3             | <u>6</u>       | <b>0</b>    | 2; 4          | <b>0; 0</b>   | 1        | 1        | 1        |
|        | <i>Avian coronavirus</i>                | Baudette           | NC_001451     | <b>0</b> | 1         | <b>0</b> | <b>0</b> | <u>6*</u> | <u>7*</u>  | 1      | <u>7*</u> | <b>0; 3</b>      | 5; 4; 1            | 0; 2             | <u>6</u>       | 1           | 2; 4          | <b>0; 0</b>   | 1        | 2        | <b>0</b> |
|        | <i>Beluga whale coronavirus SW1</i>     |                    | NC_010646     | 1        | <u>2*</u> | <b>0</b> | <b>0</b> | <u>8*</u> | <u>11*</u> | 1      | <u>8*</u> | 3; 1             | <u>7*, 4; 5</u>    | 3; 5             | <u>8</u>       | <b>0</b>    | 3; 1          | <b>0; 0</b>   | 2        | 2        | 2        |
|        | <i>Goose coronavirus</i>                | Cambridge_Bay_2017 | NC_046965     | <b>0</b> | 1         | 1        | 1        | <u>4*</u> | <u>5*</u>  | 2      | <u>4*</u> | 2; 2             | 4; 3; 2            | 3; 3             | <u>5</u>       | 1           | 1; 3          | 1*; 1*        | 1        | 2        | 3        |
|        | <i>Avian coronavirus 9203</i>           | IBV Ind-TN92-03    | NC_048213     | <b>0</b> | <b>0</b>  | 1        | <b>0</b> | <u>6*</u> | <u>6</u>   | 2      | <u>7*</u> | <b>0; 3</b>      | 5; 4; 1            | 1; 2             | <u>6</u>       | 1           | 2; 4          | <b>0; 0</b>   | 1        | 1        | 1        |
|        | <i>Duck coronavirus 2714</i>            | DK/GD/27/2014      | NC_048214     | <b>0</b> | 1         | <b>0</b> | <b>0</b> | <u>5*</u> | <u>6*</u>  | 2      | <u>5*</u> | <b>0; 3</b>      | 5; 4; 3            | 1; 1             | <u>6</u>       | 1           | 2; 4          | <b>0; 0</b>   | <b>0</b> | <b>0</b> | 1        |

**Table S4.** Field samples and viral strains used to test the inclusivity of the novel assay developed in this study.

| Genus       | virus                                 | host                            | matrix tested               | Year | Collection strategy    | strain                     |
|-------------|---------------------------------------|---------------------------------|-----------------------------|------|------------------------|----------------------------|
| <b>αCoV</b> | Alphacoronavirus 1_Feline Coronavirus | Cat                             | viral strain (cell culture) |      |                        | WSU 79-1683 (ATCC VR-989)  |
|             | Alphacoronavirus 1_Canine Coronavirus | Dog                             | viral strain (cell culture) |      |                        | Jan-71 (ATCC VR-809)       |
|             | Alphacoronavirus 1_Ferret Coronavirus | Ferret                          | feces                       | 2021 | Dry                    | IZSve21RS42-F              |
|             | Alphacoronavirus 1_Ferret Coronavirus | Ferret                          | intestine                   | 2021 | Dry                    | IZSve21RS42-18             |
|             | Alphacoronavirus 1_TGE                | Pig                             | viral strain (cell culture) |      |                        | Virulent Purdue            |
|             | Miniopterus coronavirus 1             | <i>Miniopterus schreibersii</i> | oral swab                   | 2020 | Lysis buffer           | IZSve21RS156-83            |
|             | PEDV                                  | Pig                             | feces                       | 2018 | Dry                    | 18DIA90174-11              |
|             | PEDV                                  | Pig                             | feces                       | 2018 | Dry                    | 18DIA90174-10              |
|             | Murine Coronavirus                    | <i>Mus musculus</i>             | feces                       | 2021 | Dry                    | IZSve21RS42-T              |
|             | Unclassified pipistrelle αCoV         | <i>Pipistrellus kuhlii</i>      | feces                       | 2018 | Viral transport medium | IZSve19RS495-11            |
|             | Unclassified myotis αCoV              | <i>Myotis myotis</i>            | feces                       | 2016 | RNA later              | IZSve21RS474-25            |
|             | Unclassified myotis αCoV              | <i>Myotis myotis</i>            | feces                       | 2016 | RNA later              | IZSve21RS474-36            |
| <b>βCoV</b> | Betacoronavirus 1_PHEV                | Pig                             | feces                       | 2018 | Dry                    | 18DIA90174-2               |
|             | Betacoronavirus 1_PHEV                | Pig                             | feces                       | 2018 | Dry                    | 18DIA90178-5               |
|             | Betacoronavirus 1_PHEV                | Pig                             | rectal swab                 | 2021 | RNA later              | IZSve21RS1031-16           |
|             | Betacoronavirus 1_Bovine Coronavirus  | cow                             | viral strain (cell culture) |      |                        | Mebus                      |
|             | Betacoronavirus 1_Bovine Coronavirus  | antelope                        | feces                       | 2019 | Dry                    | IZSLER32286-1/2019         |
|             | Betacoronavirus 1_Bovine Coronavirus  | antelope                        | feces                       | 2019 | Dry                    | IZSLER32286-2/2019         |
|             | Betacoronavirus Erinaceus             | <i>Erinaceus europaeum</i>      | intestine                   | 2021 | Dry                    | IZSve21RS156-83            |
|             | Unclassified Eptesicus βCoV           | <i>Eptesicus serotinus</i>      | feces                       | 2011 | Dry                    | ITA26_384_2012             |
|             | Unclassified Eidolon βCoV             | <i>Eidolon helvum</i>           | feces                       | 2013 | Dry                    | 13RS452-71                 |
|             | Unclassified Eidolon βCoV             | <i>Eidolon helvum</i>           | feces                       | 2013 | Dry                    | 13RS362-59                 |
|             | SARS-CoV-2                            | Dog                             | oral swab                   | 2020 | Dry                    | 20DIA30037-1/2020          |
|             | SARS-CoV-2                            | Human                           | viral strain (cell culture) |      |                        | 20VIR1935                  |
|             | SARS-CoV-2                            | Cat                             | nasal swab                  | 2020 | Dry                    | VE-IZSve-20DIA30040-2/2020 |
| <b>γCoV</b> | IBV                                   | Chicken                         | viral strain (egg culture)  |      |                        | IZSve21RS156-64            |
|             | duck coronavirus                      | Duck                            | feces                       | 2018 | Dry                    | IZSLER138948-2/2018        |
|             | duck coronavirus                      | Duck                            | feces                       | 2019 | Dry                    | IZSLER288952-1/2019        |
| <b>δCoV</b> | quail coronavirus                     | <i>Coturnix coturnix</i>        | intestine                   | 2019 | Dry                    | IZSLER335273/2019          |
|             | quail coronavirus                     | <i>Coturnix coturnix</i>        | intestine                   | 2019 | Dry                    | IZSLER160792/2019          |
