# Supplementary material for: Best Molecular Tools to Investigate Coronavirus Diversity in Mammals: A Comparison
Source: MDPI journal article supplement (doi:10.3390/v13101975), 2021-10-01
Supplement: s1 [file s1]

# Supplemental material to “Best molecular tools to investigate coronavirus diversity in mammals: a comparison”

Petra Drzewnioková, Francesca Festa, Valentina Panzarin, Davide Lelli, Ana Moreno, Barbara Zecchin, Paola De Benedictis and Stefania Leopardi

## *In vitro evaluation of selected protocols*

The sensitivity of single assays was evaluated for three CoV genera using cell adapted viral strains, namely one  $\alpha$ -CoV (Canine coronavirus - CaCoV), two  $\beta$ -CoVs (Bovine coronavirus – BoCoV and SARS-CoV-2) and one  $\gamma$ -CoV (Infectious Bronchitis virus - IBV). Each session included one sample (Feline coronavirus) as positive control, one negative process control and three no template controls (NTC) for the first round of RT-PCR. To perform nested PCR one more NTC was added. We used mineral oil to prevent cross-contaminations between dilutions. Reactions of the first rounds were carried out using the QIAGEN OneStep RT-PCR kit (QIAGEN) according to the manufacturer's instructions. Briefly, reaction mixtures (25  $\mu$ l) consisted of 1  $\mu$ l of the enzyme mix, 0.4 mM of each dNTPs, 10U of RNasin® Ribonuclease Inhibitor (Promega) and five microliters of RNA. One microliter of DNA from the first round was used as template in the nested PCR (25- $\mu$ l mixtures), which was carried out using the Platinum™ Taq DNA Polymerase (Invitrogen) according to the manufacturer's instructions. Primer concentrations and thermal cycles of single PCR protocols are described below. Gel electrophoresis was performed using QIAxcel Advanced System (Qiagen).

### De Souza Luna et al., 2007 [1]

#### **1° round: RT-PCR (size of PCR product: 441-455 bp):**

- *Forward primer mix:* DeSouzaLuna-F1 and DeSouzaLuna-F2 in final concentration 0.2  $\mu$ M each
- *Reverse primer mix:* DeSouzaLuna-R1, DeSouzaLuna-R2 and DeSouzaLuna-R3 in final concentration 0.9  $\mu$ M each
- *Thermal conditions:* 30 min at 50°C; 15 min at 95°C; 10 cycles of 20 s at 94°C, 30 s starting at 62°C with a decrease of 1°C per cycle, and 40 s at 72°C; 30 cycles of 20 s at 95°C, 30 s at 52°C, and 40 s at 72°C; and 1 cycle at 72°C for 10 min

#### **2° round: nested PCR (size of PCR product: 454 bp):**

- *Forward primer mix:* DeSouzaLuna-F3 and DeSouzaLuna-F4 in final concentration 0.08  $\mu$ M each
- *Reverse primer:* DeSouzaLuna-R4 in final concentration 0.4  $\mu$ M
- *Thermal conditions:* 3 min at 94°C; 30 cycles of 20 sec at 94°C, 30 sec at 52°C and 30 sec at 72°C

### Chu et al., 2011 [2]

#### **1° round: RT- PCR (size of PCR product: 602 bp):**

- *Forward primer:* Chu11-F1 in final concentration 0.6  $\mu$ M
- *Reverse primer:* Chu11-R1 in final concentration 0.6  $\mu$ M
- *Thermal conditions:* 30 min at 50°C; 15 min at 95°C; 40 cycles of 20 sec at 94°C, 40 sec at 50°C and 1 min at 72°C; and 10 min at 72°C

#### **2° round: nested PCR (size of PCR product: 440 bp):**

- *Forward primer:* Chu11-F2 in final concentration 0.4  $\mu$ M
- *Reverse primer:* Chu11-F2 in final concentration 0.4  $\mu$ M
- *Thermal conditions:* 3 min at 94°C; 30 cycles of 20 sec at 94°C, 30 sec at 50°C and 50 sec at 72°C

### Hu et al., 2018 [3]

#### **RT- PCR (size of PCR product: 668 bp):**

- *Forward primer:* Hu-F in final concentration 1  $\mu$ M
- *Reverse primer:* Hu-R in final concentration 1  $\mu$ M
- *Thermal conditions:* 30 min at 50°C; 15 min at 95°C; 35 cycles of 20 sec at 94°C, 40 sec at 52°C and 1 min at 72°C; and 10 min at 72°C.

### **This study**

1° round: *identical to RT-PCR Hu et al., 2018*

2° round: *identical to nested PCR Chu et al., 2011*

Results of the analytical sensitivity are presented in figure S1.

### **References:**

1. Luna, L.K. de S.; Heiser, V.; Regamey, N.; Panning, M.; Drexler, J.F.; Mulangu, S.; Poon, L.; Baumgarte, S.; Haijema, B.J.; Kaiser, L.; et al. Generic Detection of Coronaviruses and Differentiation at the Prototype Strain Level by Reverse Transcription-PCR and Nonfluorescent Low-Density Microarray. *Journal of Clinical Microbiology* **2007**, *45*, 1049–1052, doi:10.1128/JCM.02426-06.
2. Chu, D.K.W.; Leung, C.Y.H.; Gilbert, M.; Joyner, P.H.; Ng, E.M.; Tse, T.M.; Guan, Y.; Peiris, J.S.M.; Poon, L.L.M. Avian Coronavirus in Wild Aquatic Birds. *Journal of Virology* **2011**, *85*, 12815–12820, doi:10.1128/JVI.05838-11.
3. Hu, H.; Jung, K.; Wang, Q.; Saif, L.J.; Vlasova, A.N. Development of a One-Step RT-PCR Assay for Detection of Pancoronaviruses ( $\alpha$ -,  $\beta$ -,  $\gamma$ -, and  $\delta$ -Coronaviruses) Using Newly Designed Degenerate Primers for Porcine and Avian fecal Samples. *Journal of Virological Methods* **2018**, *256*, 116–122, doi:10.1016/j.jviromet.2018.02.021.

**Figure S1.** Analytical sensitivity of the novel assay developed in this study. The limit of detection is marked in red.

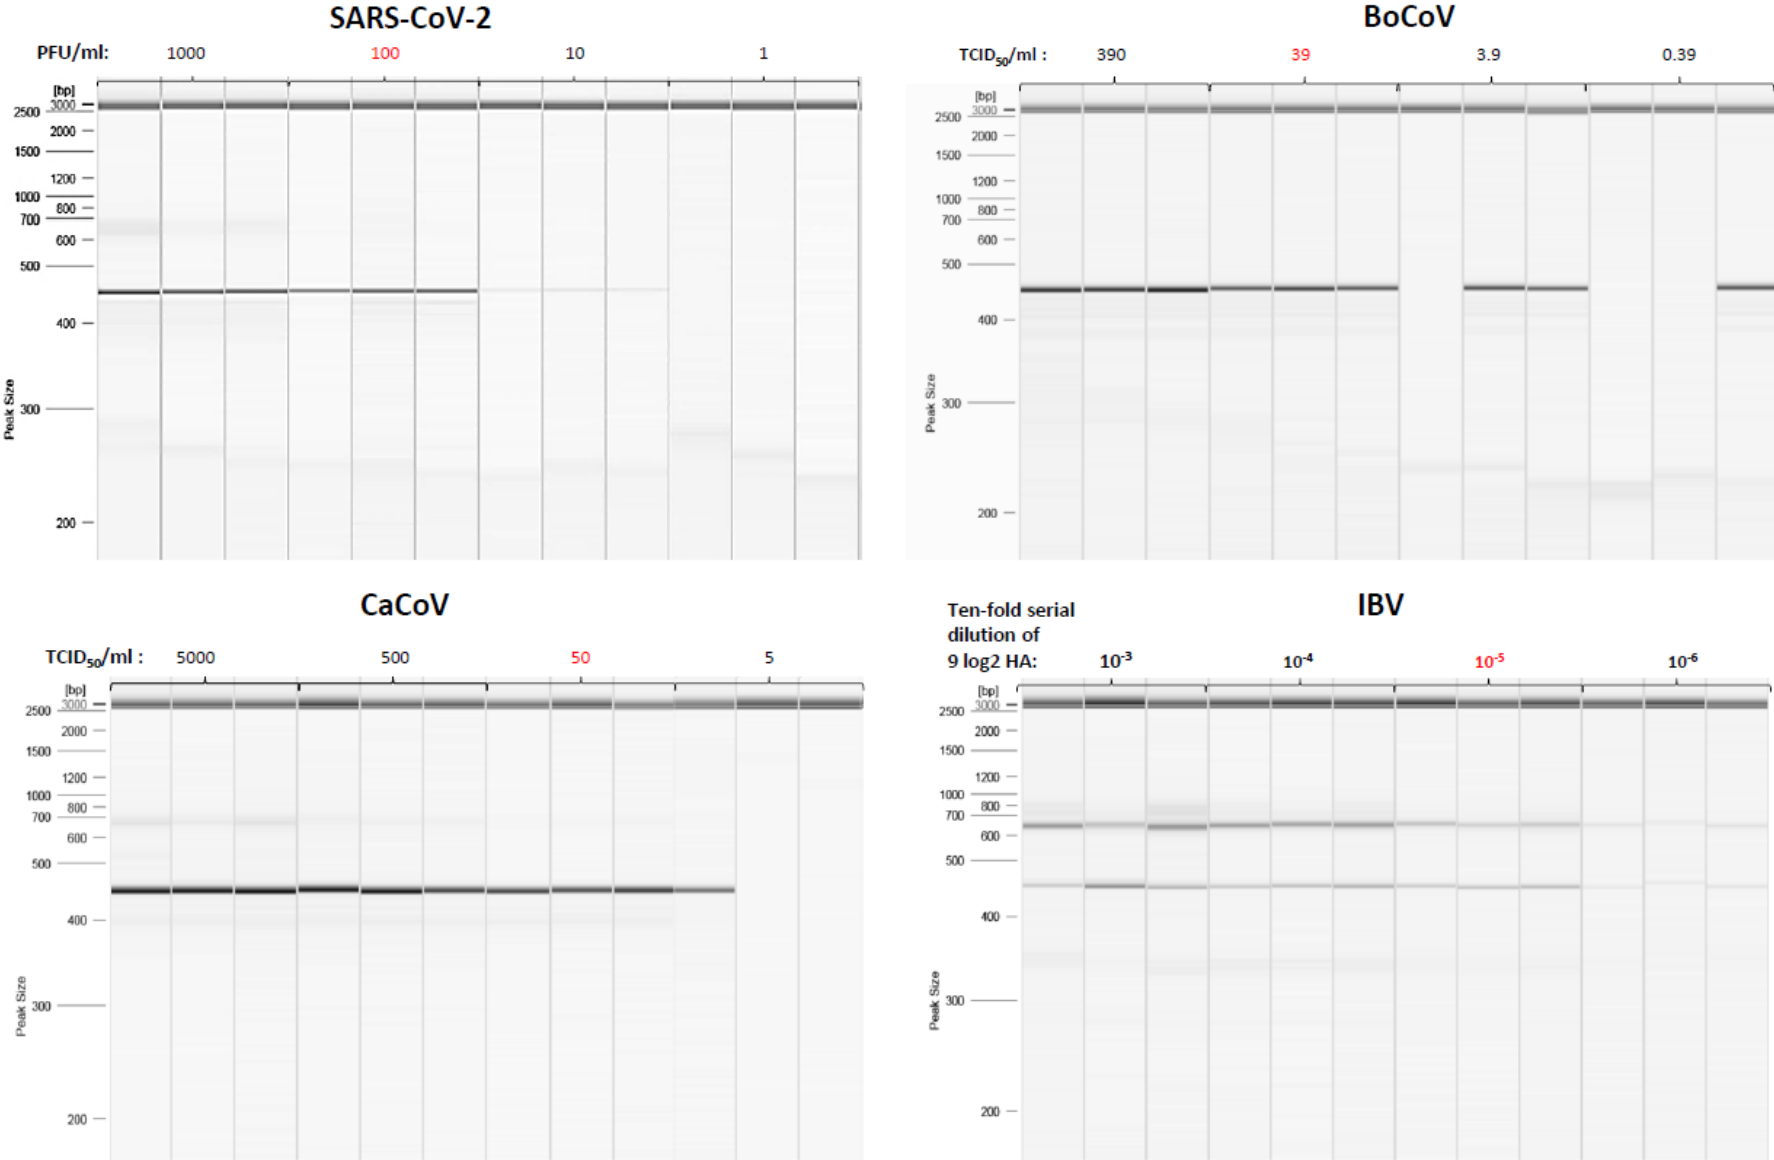

**Table S1.** Complementarity of primers with *Alfacoronavirus* sequences. The primers that did not bind to the template in *in silico* analyses are underlined (\*the mismatches were present within the 3 bp of 3'end of primer). Primer sets where at least one primer had no mismatch with the template sequence are in **bold**.

| Species                                  | Subspecies              | Isolate                          | Accession No. | Hu-F     | Hu-R     | Chu11-F1 | Chu11-R1 | Chu06-R1  | Chu06-R2  | Poon-F    | Poon-R    | DeSouzaLuna-F1+2 | DeSouzaLuna-R1+2+3 | DeSouzaLuna-F3+4 | DeSouzaLuna-R4 | Holbrook-F1 | Holbrook-R1+2 | Holbrook-F2+3 | Xiu-F1   | Xiu-R    | Xiu-F2    |
|------------------------------------------|-------------------------|----------------------------------|---------------|----------|----------|----------|----------|-----------|-----------|-----------|-----------|------------------|--------------------|------------------|----------------|-------------|---------------|---------------|----------|----------|-----------|
| <i>Alphacoronavirus 1</i>                | TGEV                    | Purdue                           | AJ271965      | <b>0</b> | <b>0</b> | <b>1</b> | <b>0</b> | <b>1</b>  | <u>2*</u> | <b>1</b>  | <b>1</b>  | <b>3; 0</b>      | 4; 2; 4            | 4; 6             | 3              | <b>1</b>    | <b>0; 2</b>   | <b>2; 0</b>   | <b>0</b> | <b>1</b> | <b>2</b>  |
|                                          | Feline CoV              | Type I<br>C1Je                   | DQ848678      | <b>0</b> | <b>0</b> | <b>1</b> | <b>1</b> | <b>3</b>  | <u>4*</u> | <b>1</b>  | <b>3</b>  | <b>3; 0</b>      | 4; 2; 4            | 4; 6             | 3              | <b>1</b>    | 1; 3          | <b>2; 0</b>   | <b>1</b> | <b>2</b> | <b>2</b>  |
|                                          |                         | Type II<br>FIP virus WSU 79-1146 | AY994055      | <b>0</b> | <b>0</b> | <b>0</b> | <b>0</b> | <b>1</b>  | <u>2*</u> | <b>1</b>  | <b>1</b>  | 3; 1             | 4; 2; 4            | 4; 6             | 3              | <b>0</b>    | <b>0; 2</b>   | <b>2; 0</b>   | <b>0</b> | <b>1</b> | <b>2</b>  |
|                                          | Porcine respiratory CoV | ISU-1                            | DQ811787      | <b>0</b> | <b>0</b> | <b>1</b> | <b>0</b> | <b>1</b>  | <u>2*</u> | <b>1</b>  | <b>1</b>  | <b>3; 0</b>      | 4; 2; 4            | 3; 5             | 3              | <b>1</b>    | <b>0; 2</b>   | <b>2; 0</b>   | <b>0</b> | <b>1</b> | <b>2</b>  |
|                                          | Canine CoV              | Type I<br>23/03                  | KP849472      | <b>0</b> | <b>0</b> | <b>1</b> | <b>1</b> | <b>1</b>  | <u>2*</u> | <b>1</b>  | <b>1</b>  | <b>3; 0</b>      | 4; 2; 4            | 4; 6             | 4              | <b>1</b>    | <b>0; 2</b>   | <b>2; 0</b>   | <b>1</b> | <b>2</b> | <b>2</b>  |
|                                          |                         | Type II<br>NTU336/F/2008         | GQ477367      | <b>0</b> | <b>0</b> | <b>1</b> | <b>0</b> | <b>1</b>  | <u>2*</u> | <b>1</b>  | <b>1</b>  | 3; 1             | 4; 2; 4            | 4; 6             | 3              | <b>1</b>    | <b>0; 2</b>   | <b>2; 0</b>   | <b>0</b> | <b>0</b> | <b>2</b>  |
|                                          |                         | Type IIa<br>CB/05                | KP981644      | <b>0</b> | <b>0</b> | <b>1</b> | <b>0</b> | <b>2</b>  | <u>3*</u> | <b>1</b>  | <b>2</b>  | <b>3; 0</b>      | 3; 2; 3            | 4; 6             | 4              | <b>1</b>    | <b>0; 2</b>   | <b>2; 0</b>   | <b>0</b> | <b>1</b> | <b>2</b>  |
|                                          |                         | Type IIb<br>174/06, type IIb     | EU856362      | <b>0</b> | <b>0</b> | <b>1</b> | <b>0</b> | <b>2</b>  | <u>3*</u> | <b>1</b>  | <b>2</b>  | <b>3; 0</b>      | 3; 2; 3            | 4; 6             | 4              | <b>1</b>    | <b>0; 2</b>   | <b>2; 0</b>   | <b>0</b> | <b>1</b> | <b>2</b>  |
| <i>Bat coronavirus HKU10</i>             |                         | 183A                             | NC_018871     | <b>0</b> | <b>1</b> | <b>0</b> | <b>0</b> | <b>2</b>  | <u>3*</u> | <b>1</b>  | <b>2</b>  | <u>2*; 3*</u>    | 3; 2; 3            | 2; 4             | <u>5</u>       | <b>1</b>    | <b>0; 2</b>   | <b>0; 0</b>   | <b>0</b> | <b>2</b> | <b>2</b>  |
| <i>Bat coronavirus CDPHE15</i>           |                         | bat/USA/CDPHE15/2006             | NC_022103     | <b>0</b> | <b>1</b> | <b>0</b> | <b>0</b> | <b>4</b>  | <u>5*</u> | <b>2</b>  | <b>4</b>  | 3; 2             | 7; 5; 3            | 4; 5             | <u>6</u>       | <b>1</b>    | 2; 4          | <b>0; 0</b>   | <b>0</b> | <b>1</b> | <b>3</b>  |
| <i>Human coronavirus 229E</i>            |                         | KW2E-<br>F151/Hipcrub/GHA/11     | KT253269      | <b>0</b> | <b>1</b> | <b>0</b> | <b>0</b> | <b>3</b>  | <u>3*</u> | <b>0</b>  | <b>3</b>  | 2; 1             | 4; 1; 4            | 3; 5             | 3              | <b>1</b>    | 1; 3          | <b>0; 0</b>   | <b>0</b> | <b>2</b> | <b>1</b>  |
|                                          |                         | Human coronavirus 229E           | NC_002645     | <b>1</b> | <b>0</b> | <b>1</b> | <b>0</b> | <b>2</b>  | <u>2*</u> | <b>1</b>  | <b>2</b>  | <b>3; 0</b>      | <b>3; 0; 5</b>     | 4; 6             | 3              | <b>1</b>    | 1; 3          | <b>0; 0</b>   | <b>2</b> | <b>0</b> | <b>2</b>  |
|                                          |                         | camel/Riyadh/Ry141/15            | NC_028752     | <b>0</b> | <b>0</b> | <b>1</b> | <b>0</b> | <b>1</b>  | <u>2*</u> | <b>1</b>  | <b>1</b>  | 3; 1             | <b>3; 0; 5</b>     | 4; 6             | 2              | <b>1</b>    | <b>0; 2</b>   | <b>0; 0</b>   | <b>2</b> | <b>0</b> | <b>2</b>  |
| <i>Human coronavirus NL63</i>            |                         | NL63 Amsterdam I                 | AY567487      | <b>0</b> | <b>1</b> | <b>1</b> | <b>1</b> | <b>2</b>  | <u>3*</u> | <b>3</b>  | <u>3*</u> | <b>0; 3</b>      | 3; 1; 5            | <b>2; 0</b>      | 3              | <b>1</b>    | 1; 3          | <b>0; 0</b>   | <b>0</b> | <b>3</b> | <b>2</b>  |
| <i>Lucheng Rn rat coronavirus</i>        |                         | Lucheng-19                       | NC_032730     | <b>0</b> | <b>0</b> | <b>1</b> | <b>0</b> | <b>1</b>  | <u>2*</u> | <b>1</b>  | <b>1</b>  | 2; 2             | 4; 2; 4            | 3; 3             | 2              | <b>1</b>    | <b>0; 2</b>   | <b>2; 0</b>   | <b>1</b> | <b>0</b> | <b>2</b>  |
| <i>Miniopterus bat CoV 1</i>             | B                       | AFCD307                          | NC_010436     | <b>1</b> | <b>1</b> | <b>1</b> | <b>1</b> | <b>3</b>  | <b>3</b>  | <b>1</b>  | <b>3</b>  | 3; 2             | 4; 3; 3            | 4; 6             | 4              | <b>1</b>    | 1; 3          | <b>0; 0</b>   | <b>2</b> | <b>1</b> | <b>2</b>  |
|                                          | A                       | AFCD62                           | NC_010437     | <b>1</b> | <b>0</b> | <b>1</b> | <b>1</b> | <b>2</b>  | <b>2</b>  | <b>2</b>  | <b>2</b>  | 2; 2             | 5; 3; 4            | 3; 3             | 4              | <b>1</b>    | 2; 4          | <b>0; 0</b>   | <b>1</b> | <b>0</b> | <b>3</b>  |
| <i>Miniopterus bat CoV HKU8</i>          |                         | AFCD77/08/05 Mm                  | NC_010438     | <b>0</b> | <b>1</b> | <b>0</b> | <b>1</b> | <b>2</b>  | <b>1</b>  | <b>2</b>  | <b>2</b>  | <u>2*; 4*</u>    | 2; 1; 4            | 2; 4             | 3              | <b>1</b>    | <b>0; 2</b>   | <b>2; 0</b>   | <b>2</b> | <b>1</b> | <b>1</b>  |
| <i>Mink coronavirus 1</i>                |                         | WD1127                           | NC_023760     | <b>0</b> | <b>0</b> | <b>0</b> | <b>1</b> | <b>2</b>  | <b>2</b>  | <b>3</b>  | <b>2</b>  | 0; 3             | 5; 3; 4            | 2; 1             | <u>5</u>       | <b>2</b>    | <b>0; 2</b>   | <b>3; 1</b>   | <b>0</b> | <b>2</b> | <b>2</b>  |
| <i>Myotis ricketti alphaCoV</i>          |                         | Sax-2011                         | NC_028811     | <b>0</b> | <b>1</b> | <b>0</b> | <b>0</b> | <u>6*</u> | <u>7*</u> | <b>0</b>  | <u>6*</u> | 1; 2             | 6; 5; 2            | 1; 3             | <u>7</u>       | <b>1</b>    | 2; 4          | <b>2; 0</b>   | <b>2</b> | <b>1</b> | <b>1</b>  |
| <i>NL-63-related bat CoV</i>             |                         | BtKYNL63-9b                      | NC_048216     | <b>0</b> | <b>1</b> | <b>0</b> | <b>0</b> | <b>2</b>  | <u>4*</u> | <b>2</b>  | <u>3*</u> | <u>2*; 3*</u>    | 3; 2; 3            | 3; 5             | 4              | <b>1</b>    | <b>0; 2</b>   | <b>0; 0</b>   | <b>2</b> | <b>1</b> | <b>1</b>  |
| <i>Nyctalus velutinus alphaCoV</i>       |                         | SC-2013                          | NC_028833     | <b>0</b> | <b>1</b> | <b>0</b> | <b>1</b> | <b>4</b>  | <u>5*</u> | <b>1</b>  | <u>5*</u> | <u>2*; 3*</u>    | 4; 3; 2            | 2; 4             | <u>5</u>       | <b>1</b>    | 1; 3          | <b>0; 0</b>   | <b>0</b> | <b>1</b> | <b>2</b>  |
| <i>Pipistrellus khulii coronavirus</i>   |                         | P.kuhlil/Italy/3398-19/2015      | NC_046964     | <b>0</b> | <b>0</b> | <b>0</b> | <b>1</b> | <u>5</u>  | <u>7*</u> | <b>2</b>  | <u>6*</u> | <u>2*; 3*</u>    | 6; 5; 1            | 2; 4             | <u>9</u>       | <b>1</b>    | 3; 5          | <b>0; 0</b>   | <b>1</b> | <b>1</b> | <b>1</b>  |
| <i>Porcine epidemic diarrhea virus</i>   |                         | CV777                            | NC_003436     | <b>0</b> | <b>0</b> | <b>1</b> | <b>1</b> | <b>1</b>  | <u>3*</u> | <u>4*</u> | <u>2*</u> | <u>1*; 4*</u>    | 3; 0; 5            | <u>3*</u>        | 4              | <b>1</b>    | <b>0; 2</b>   | 1; 1          | <b>0</b> | <b>1</b> | <u>3*</u> |
|                                          |                         |                                  |               |          |          |          |          |           |           |           |           |                  |                    | <u>4*</u>        |                |             |               |               |          |          | <u>1*</u> |
| <i>Rhinolophus ferrumequinum alhaCoV</i> |                         | HuB-2013                         | NC_028814     | <b>0</b> | <b>0</b> | <b>1</b> | <b>1</b> | <b>2</b>  | <b>3</b>  | <b>3</b>  | <u>3*</u> | <u>4*; 2*</u>    | 5; 3; 4            | <u>6; 7</u>      | <u>5</u>       | <b>2</b>    | 2; 4          | 3; 1          | <b>0</b> | <b>2</b> | <b>4</b>  |
| <i>Rhinophilus bat coronavirus HKU2</i>  |                         | HKU2/HK/46/2006                  | EF203065      | <b>0</b> | <b>1</b> | <b>1</b> | <b>0</b> | <b>2</b>  | <u>4*</u> | <b>3</b>  | <u>3*</u> | 2; 3             | 3; 2; 3            | 3; 3             | <u>5</u>       | <b>1</b>    | <b>0; 2</b>   | <b>0; 0</b>   | <b>1</b> | <b>1</b> | <b>2</b>  |
| <i>Scotophilus bat coronavirus</i>       |                         | 512/2005                         | NC_009657     | <b>0</b> | <b>1</b> | <b>1</b> | <b>1</b> | <b>2</b>  | <u>4*</u> | <b>2</b>  | <u>3*</u> | 2; 2             | 4; 1; 5            | 3; 5             | <u>5</u>       | <b>1</b>    | <b>0; 2</b>   | <b>0; 0</b>   | <b>1</b> | <b>2</b> | <b>1</b>  |
| <i>Sorex araneus coronavirus</i>         |                         | Shrew-CoV/Tibet2014              | NC_046955     | <b>0</b> | <b>1</b> | <b>0</b> | <b>0</b> | <b>3</b>  | <u>4*</u> | <b>3</b>  | <b>3</b>  | <u>2*; 4*</u>    | 4; 3; 3            | 4; 4             | 4              | <b>1</b>    | 1; 3          | <b>0; 0</b>   | <b>1</b> | <b>2</b> | <b>2</b>  |
| <i>Suncus murinus coronavirus</i>        |                         | Xingguo-101                      | NC_035191     | <b>0</b> | <b>0</b> | <b>2</b> | <b>1</b> | <u>5*</u> | <u>7*</u> | <b>4</b>  | <u>6*</u> | 2; 1             | <u>3*; 5*; 7*</u>  | 5; 3             | <u>8</u>       | <b>1</b>    | <b>2; 0</b>   | <b>2; 0</b>   | <b>0</b> | <b>0</b> | <b>3</b>  |

**Table S2.** Complementarity of primers with *Betacoronavirus* sequences. The primers that did not bind to the template in *in silico* analyses are underlined (\*the mismatches were present within the 3 bp of 3'end of primer). Primer sets where at least one primer had no mismatch with the template sequence are in **bold**.

| Species                                  | Subspecies                | Isolate                        | Accession No. | Hu-F     | Hu-R     | Chu11-F1 | Chu11-R1 | Chu06-R1 | Chu06-R2  | Poon-F    | Poon-R    | DeSouzaLuna-F1+2 | DeSouzaLuna-R1+2+3 | DeSouzaLuna-F3+4 | DeSouzaLuna-R4 | Holbrook-F1 | Holbrook-R1+2 | Holbrook-F2+3 | Xiu-F1   | Xiu-R    | Xiu-F2   |
|------------------------------------------|---------------------------|--------------------------------|---------------|----------|----------|----------|----------|----------|-----------|-----------|-----------|------------------|--------------------|------------------|----------------|-------------|---------------|---------------|----------|----------|----------|
| <i>Betacoronavirus 1</i>                 | Human CoV OC43            | ATCC VR-759                    | AY585228      | <b>0</b> | <b>0</b> | <b>0</b> | <b>0</b> | 4        | <u>7*</u> | 1         | 4         | <b>0; 3</b>      | 1; 4; 5            | <b>0; 2</b>      | <u>6</u>       | 1           | <b>2; 0</b>   | <b>0; 2*</b>  | <b>0</b> | 1        | <b>0</b> |
|                                          | Bovine coronavirus        | Mebus                          | BCU00735      | <b>0</b> | <b>0</b> | <b>0</b> | <b>0</b> | 4        | <u>7*</u> | 1         | 4         | <b>0; 3</b>      | 1; 4; 5            | <b>0; 2</b>      | <u>6</u>       | 1           | <b>2; 0</b>   | <b>0; 2*</b>  | <b>0</b> | 1        | <b>0</b> |
|                                          | PHEV                      | VW572                          | NC_007732     | <b>0</b> | <b>0</b> | 1        | 1        | 4        | <u>7*</u> | 2         | 4         | <b>0; 3</b>      | 1; 4; 5            | 1; 2             | <u>5</u>       | 1           | <b>2; 0</b>   | <b>0; 2*</b>  | 1        | 2        | 1        |
|                                          | Equine coronavirus        | NC99                           | NC_010327     | <b>0</b> | 1        | <b>0</b> | <b>0</b> | 4        | <u>7*</u> | 1         | 4         | <b>0; 3</b>      | 1; 4; 5            | <b>0; 2</b>      | <u>6</u>       | 1           | <b>2; 0</b>   | <b>0; 2*</b>  | <b>0</b> | 2        | <b>0</b> |
| <i>China Rattus coronavirus HKU24</i>    |                           | HKU24-R05005I                  | NC_026011     | <b>0</b> | <b>0</b> | <b>0</b> | 1        | 4        | <u>7*</u> | <u>2*</u> | 4         | 1; 3             | 1; 4; 5            | <u>3*, 5*</u>    | <u>7</u>       | 1           | 3*; 1         | <b>2; 0</b>   | 1        | 2        | 1        |
| <i>Eidolon bat coronavirus C704</i>      |                           | Kenya/KY24/2006                | HQ728482      | 1        | <b>0</b> | <b>0</b> | 1        | 4        | <u>7*</u> | <b>0</b>  | 4         | 2; 2             | 2; 3; 7            | 3; 5             | <u>7</u>       | 1           | <b>0; 0</b>   | <b>2; 0</b>   | 1        | 1        | 2        |
| <i>Hedgehog coronavirus 1</i>            |                           | ErinaceusCoV/2012-174/GER/2012 | NC_039207     | <b>0</b> | 1        | <b>0</b> | 1        | 2        | <u>4*</u> | 2         | <u>3*</u> | <u>1*, 4*</u>    | 4; 1; 5            | 1; 3             | <u>5</u>       | 1           | <b>0; 2*</b>  | <b>0; 2</b>   | 1        | 1        | 2        |
| <i>Human coronavirus HKU1</i>            |                           | HKU1                           | NC_006577     | <b>0</b> | <b>0</b> | <b>0</b> | 1        | 4        | <u>7*</u> | 2         | 4         | <b>0; 3</b>      | 1; 4; 5            | 1; 1             | <u>6</u>       | 1           | <b>0; 2*</b>  | <b>2; 0</b>   | 1        | <b>0</b> | 1        |
| <i>MERS-related coronavirus</i>          |                           | camel/UAE_B21_2015             | MF598613      | <b>0</b> | <b>0</b> | <b>0</b> | <b>0</b> | 3        | <u>3*</u> | 2         | 3         | <u>1*, 4*</u>    | 3; 2; 4            | 1; 3             | <u>5</u>       | 4           | <b>0; 0</b>   | <b>0; 2</b>   | 1        | 2        | 2        |
|                                          |                           | HCoV-EMC/2012                  | NC_019843     | <b>0</b> | <b>0</b> | <b>0</b> | <b>0</b> | 3        | <u>3*</u> | 2         | 3         | <u>1*, 4*</u>    | 3; 2; 4            | 1; 3             | <u>5</u>       | 1           | <b>0; 2*</b>  | <b>0; 2</b>   | 1        | 3        | 2        |
|                                          |                           | Rat CoV Parker                 | FJ938068      | <b>0</b> | <b>0</b> | <b>0</b> | 1        | 4        | <u>7*</u> | <b>0</b>  | 4         | 1; 2             | 1; 4; 5            | 1; 3             | <u>5</u>       | 1           | <b>2; 0</b>   | <b>0; 2*</b>  | 1        | 1        | 1        |
| <i>Murine coronavirus</i>                | Rat coronavirus           | JHM                            | NC_006852     | <b>0</b> | <b>0</b> | <b>0</b> | 1        | <u>5</u> | <u>8*</u> | 1         | <u>5</u>  | 2; 2             | 2; 5; 6            | 3; 3             | <u>6</u>       | 1           | <u>3*, 4*</u> | <b>0; 2*</b>  | 1        | 1        | 2        |
| <i>Myodes coronavirus 2/JL14</i>         |                           | RtMruf-CoV-2/JL2014            | NC_046954     | 1        | <b>0</b> | 1        | 1        | 4        | <u>7*</u> | 3         | 4         | 1; 2             | 1; 4; 5            | 2; 2             | <u>6</u>       | 1           | <b>0; 2*</b>  | <b>2; 0</b>   | 2        | 2        | 2        |
| <i>Pipistrellus bat coronavirus HKU5</i> |                           | HKU5-1 LMH03f                  | NC_009020     | <b>0</b> | 1        | 1        | <b>0</b> | 3        | <u>5*</u> | 3         | <u>4*</u> | <u>2*, 3*</u>    | 4; 3; 3            | 4; 4             | <u>6</u>       | 1           | <b>0; 2*</b>  | 1; 3          | 2        | 1        | 2        |
| <i>Rousettus bat coronavirus HKU9</i>    |                           | HKU9-1 BF_005I                 | NC_009021     | 1        | <b>0</b> | <b>0</b> | 1        | 4        | <u>7*</u> | 1         | 4         | 2; 1             | 2; 3; 6            | 4; 4             | <u>7</u>       | 1           | <b>0; 2*</b>  | 3; 1          | 2        | 2        | <b>0</b> |
| <i>SARS-related CoV</i>                  | human CoV                 | Urbani                         | AY278741      | <b>0</b> | 1        | 1        | <b>0</b> | 2        | 2         | 3         | <u>3*</u> | <b>0; 3</b>      | <b>3; 0; 5</b>     | 2; 1             | 4              | 1           | 1; 3          | <b>0; 0</b>   | 2        | 1        | 2        |
|                                          | palm civet CoV            | SZ3/2003                       | AY304486      | <b>0</b> | 1        | 1        | <b>0</b> | 2        | 2         | 3         | <u>3*</u> | <b>0; 3</b>      | <b>3; 0; 5</b>     | 2; 1             | 4              | 1           | 1; 3          | <b>0; 0</b>   | 2        | 1        | 2        |
|                                          | chinese ferret-badger CoV | CFB/SZ/94/03                   | AY545919      | <b>0</b> | <b>0</b> | 1        | <b>0</b> | 2        | 2         | 3         | <u>3*</u> | <b>0; 3</b>      | <b>3; 0; 5</b>     | 2; 1             | 4              | 1           | 1; 3          | <b>0; 0</b>   | 2        | 1        | 2        |
|                                          | SARS-CoV-2                | human/IT/32898/2020            | MT483878      | <b>0</b> | <b>0</b> | <b>0</b> | 1        | 4        | 4         | 2         | <u>5*</u> | <b>0; 3</b>      | 5; 3; 4            | 1; 1             | <u>5</u>       | 1           | 3; 5          | <b>0; 0</b>   | 1        | <b>0</b> | 1        |
|                                          | Rhinopholus bat CoV       | Rp3/2004                       | NC_009693     | <b>0</b> | 1        | 1        | <b>0</b> | 2        | 2         | 3         | <u>3*</u> | <b>0; 3</b>      | <b>3; 0; 5</b>     | 2; 1             | <u>5</u>       | 1           | 1; 3          | <b>0; 2*</b>  | 2        | 1        | 2        |
|                                          |                           | HKU3-1                         | NC_009694     | <b>0</b> | <b>0</b> | 1        | 1        | 3        | 3         | 3         | <u>4*</u> | <u>3*, 3*</u>    | 4; 1; 4            | 5; 4             | <u>5</u>       | 1           | 2; 4          | <b>0; 2*</b>  | 4        | <b>0</b> | 4        |
|                                          |                           | Rf1/2004                       | NC_009695     | <b>0</b> | <b>0</b> | 1        | 1        | 2        | 2         | 3         | <u>3*</u> | <u>2*, 3*</u>    | <b>3; 0; 5</b>     | 4; 3             | 4              | 1           | 1; 3          | <b>0; 2*</b>  | 4        | <b>0</b> | 4        |
|                                          |                           | Rm1/2005                       | NC_009696     | <b>0</b> | 1        | 1        | 1        | 2        | 2         | 1         | <u>3*</u> | 1; 2             | <b>3; 0; 5</b>     | 2; 3             | 4              | 1           | 1; 3          | <b>0; 2*</b>  | 2        | 1        | 2        |
| <i>Tylonycteris bat coronavirus HKU4</i> |                           | HKU4-1 BO4f                    | NC_009019     | <b>0</b> | 1        | <b>0</b> | <b>0</b> | 3        | <u>4*</u> | 2         | 3         | <u>2*, 4*</u>    | 6; 4; 3            | 3; 5             | 4              | 1           | <b>0; 2*</b>  | 2; 4          | 1        | <b>0</b> | 1        |
| <i>Bat Hp-betacoronavirus</i>            |                           | Zhejiang2013                   | NC_025217     | 1        | <b>0</b> | <b>0</b> | <b>0</b> | 3        | <u>4*</u> | 1         | 3         | 1; 3             | 4; 3; 3            | 1; 3             | <u>6</u>       | 1           | <b>0; 2*</b>  | 1; 3          | <b>0</b> | 3        | 1        |

**Table S3.** Complementarity of primers with *Gammacoronavirus* and *Deltacoronavirus* sequences. The primers that did not bind to the template in *in silico* analyses are underlined (\*the mismatches were present within the 3 bp of 3' end of primer). Primer sets where at least one primer had no mismatch with the template sequence are in **bold**.

| Genus | Species                                 | Isolate            | Accession No. | Hu-F     | Hu-R      | Chu11-F1 | Chu11-R1 | Chu06-R1  | Chu06-R2   | Poon-F   | Poon-R    | DeSouzaLuna-F1+2 | DeSouzaLuna-R1+2+3 | DeSouzaLuna-F3+4 | DeSouzaLuna-R4 | Holbrook-F1 | Holbrook-R1+2 | Holbrook-F2+3 | Xiu-F1   | Xiu-R    | Hu-F2    |
|-------|-----------------------------------------|--------------------|---------------|----------|-----------|----------|----------|-----------|------------|----------|-----------|------------------|--------------------|------------------|----------------|-------------|---------------|---------------|----------|----------|----------|
| δ-CoV | <i>Coronavirus HKU15</i>                |                    | LC216915      | <b>0</b> | <b>0</b>  | <b>0</b> | <b>0</b> | <u>5*</u> | <u>9*</u>  | <b>2</b> | <u>6*</u> | <u>3*, 5*</u>    | <u>5*, 4*, 4*</u>  | 4; 6             | <u>8*</u>      | <b>1</b>    | <b>0; 2</b>   | <b>2*, 0</b>  | <b>1</b> | <b>0</b> | <b>1</b> |
|       | <i>Bulbul coronavirus HKU11-934</i>     |                    | NC_011547     | <b>0</b> | <b>1</b>  | <b>1</b> | <b>1</b> | <u>2*</u> | <u>6*</u>  | <b>3</b> | <u>3*</u> | <u>3*, 5*</u>    | 4; 2; 5            | <u>5; 5</u>      | <b>4</b>       | <b>1</b>    | <b>0; 2</b>   | <b>2*, 0</b>  | <b>0</b> | <b>1</b> | <b>2</b> |
|       | <i>Thrush coronavirus HKU12-600</i>     |                    | NC_011549     | <b>0</b> | <b>0</b>  | <b>0</b> | <b>1</b> | <u>5*</u> | <u>8*</u>  | <b>2</b> | <u>6*</u> | <u>3*, 4*</u>    | 4; 3; 3            | 4; 6             | <u>7</u>       | <b>1</b>    | <b>0; 2</b>   | <b>2*, 0</b>  | <b>0</b> | <b>1</b> | <b>1</b> |
|       | <i>Munia coronavirus HKU13-3514</i>     |                    | NC_011550     | <b>0</b> | <b>0</b>  | <b>2</b> | <b>0</b> | <u>2*</u> | <u>6*</u>  | <b>4</b> | <u>3*</u> | <u>4*, 5*</u>    | 4; 2; 5            | <u>6; 6</u>      | <b>4</b>       | <b>1</b>    | <b>0; 2</b>   | <b>1*, 1*</b> | <b>0</b> | <b>1</b> | <b>3</b> |
|       | <i>White-eye coronavirus HKU16</i>      |                    | NC_016991     | <b>0</b> | <b>0</b>  | <b>0</b> | <b>1</b> | <u>4*</u> | <u>7*</u>  | <b>2</b> | <u>4*</u> | <u>3*, 5*</u>    | <u>5*, 2*, 5*</u>  | 4; 6             | <u>7*</u>      | <b>1</b>    | <b>0; 2</b>   | <b>2*, 1*</b> | <b>0</b> | <b>1</b> | <b>1</b> |
|       | <i>Night-heron coronavirus HKU19</i>    |                    | NC_016994     | <b>0</b> | <b>1</b>  | <b>0</b> | <b>0</b> | <u>3*</u> | <u>5*</u>  | <b>3</b> | <u>4*</u> | <u>6*, 7*</u>    | 2; 1; 4            | <u>7; 9</u>      | <b>4</b>       | <b>0</b>    | <b>0; 2</b>   | <b>2*, 0</b>  | <b>1</b> | <b>1</b> | <b>2</b> |
|       | <i>Wigeon coronavirus HKU20</i>         |                    | NC_016995     | <b>0</b> | <b>1</b>  | <b>0</b> | <b>0</b> | <u>4*</u> | <u>9*</u>  | <b>2</b> | <u>5*</u> | 3; 5             | <u>6*, 4*, 6*</u>  | <u>5; 5</u>      | <u>8*</u>      | <b>1</b>    | 1; 3          | <b>2*, 0</b>  | <b>1</b> | <b>0</b> | <b>1</b> |
|       | <i>Common moorhen coronavirus HKU21</i> |                    | NC_016996     | <b>0</b> | <b>1</b>  | <b>0</b> | <b>1</b> | <u>5*</u> | <u>9*</u>  | <b>1</b> | <u>6*</u> | 3; 6             | <u>7*, 5*, 5*</u>  | 3; 5             | <u>8*</u>      | <b>1</b>    | 1; 3          | <b>1*, 1*</b> | <b>0</b> | <b>2</b> | <b>0</b> |
|       | <i>Coronavirus HKU15</i>                |                    | NC_039208     | <b>0</b> | <b>0</b>  | <b>0</b> | <b>0</b> | <u>5*</u> | <u>9*</u>  | <b>2</b> | <u>5*</u> | <u>3*, 5*</u>    | <u>5*, 4*, 4*</u>  | 4; 6             | <u>8*</u>      | <b>1</b>    | <b>0; 2</b>   | <b>2*, 0</b>  | <b>1</b> | <b>0</b> | <b>1</b> |
| γ-CoV | <i>Turkey coronavirus</i>               | TCoV-ATCC          | EU022526      | <b>0</b> | <b>0</b>  | <b>0</b> | <b>0</b> | <u>6*</u> | <u>6</u>   | <b>2</b> | <u>7*</u> | 1; 3             | 5; 4; 1            | 1; 3             | <u>6</u>       | <b>0</b>    | 2; 4          | <b>0; 0</b>   | <b>1</b> | <b>1</b> | <b>1</b> |
|       | <i>Avian coronavirus</i>                | Baudette           | NC_001451     | <b>0</b> | <b>1</b>  | <b>0</b> | <b>0</b> | <u>6*</u> | <u>7*</u>  | <b>1</b> | <u>7*</u> | <b>0; 3</b>      | 5; 4; 1            | 0; 2             | <u>6</u>       | <b>1</b>    | 2; 4          | <b>0; 0</b>   | <b>1</b> | <b>2</b> | <b>0</b> |
|       | <i>Beluga whale coronavirus SW1</i>     |                    | NC_010646     | <b>1</b> | <u>2*</u> | <b>0</b> | <b>0</b> | <u>8*</u> | <u>11*</u> | <b>1</b> | <u>8*</u> | 3; 1             | <u>7*, 4; 5</u>    | 3; 5             | <u>8</u>       | <b>0</b>    | 3; 1          | <b>0; 0</b>   | <b>2</b> | <b>2</b> | <b>2</b> |
|       | <i>Goose coronavirus</i>                | Cambridge_Bay_2017 | NC_046965     | <b>0</b> | <b>1</b>  | <b>1</b> | <b>1</b> | <u>4*</u> | <u>5*</u>  | <b>2</b> | <u>4*</u> | 2; 2             | 4; 3; 2            | 3; 3             | <u>5</u>       | <b>1</b>    | 1; 3          | <b>1*, 1*</b> | <b>1</b> | <b>2</b> | <b>3</b> |
|       | <i>Avian coronavirus 9203</i>           | IBV Ind-TN92-03    | NC_048213     | <b>0</b> | <b>0</b>  | <b>1</b> | <b>0</b> | <u>6*</u> | <u>6</u>   | <b>2</b> | <u>7*</u> | <b>0; 3</b>      | 5; 4; 1            | 1; 2             | <u>6</u>       | <b>1</b>    | 2; 4          | <b>0; 0</b>   | <b>1</b> | <b>1</b> | <b>1</b> |
|       | <i>Duck coronavirus 2714</i>            | DK/GD/27/2014      | NC_048214     | <b>0</b> | <b>1</b>  | <b>0</b> | <b>0</b> | <u>5*</u> | <u>6*</u>  | <b>2</b> | <u>5*</u> | <b>0; 3</b>      | 5; 4; 3            | 1; 1             | <u>6</u>       | <b>1</b>    | 2; 4          | <b>0; 0</b>   | <b>0</b> | <b>0</b> | <b>1</b> |

**Table S4.** Field samples and viral strains used to test the inclusivity of the novel assay developed in this study.

| Genus         | virus                                 | host                            | matrix tested               | Year | Collection strategy    | strain                     |
|---------------|---------------------------------------|---------------------------------|-----------------------------|------|------------------------|----------------------------|
| $\alpha$ -CoV | Alphacoronavirus 1_Feline Coronavirus | Cat                             | viral strain (cell culture) |      |                        | WSU 79-1683 (ATCC VR-989)  |
|               | Alphacoronavirus 1_Canine Coronavirus | Dog                             | viral strain (cell culture) |      |                        | Jan-71 (ATCC VR-809)       |
|               | Alphacoronavirus 1_Ferret Coronavirus | Ferret                          | feces                       | 2021 | Dry                    | IZSVe21RS42-F              |
|               | Alphacoronavirus 1_Ferret Coronavirus | Ferret                          | intestine                   | 2021 | Dry                    | IZSVe21RS42-18             |
|               | Alphacoronavirus 1_TGE                | Pig                             | viral strain (cell culture) |      |                        | Virulent Purdue            |
|               | Miniopterus coronavirus 1             | <i>Miniopterus schreibersii</i> | oral swab                   | 2020 | Lysis buffer           | IZSVe21RS156-83            |
|               | PEDV                                  | Pig                             | feces                       | 2018 | Dry                    | 18DIA90174-11              |
|               | PEDV                                  | Pig                             | feces                       | 2018 | Dry                    | 18DIA90174-10              |
|               | Unclassified pipistrelle $\alpha$ CoV | <i>Pipistrellus kuhlii</i>      | feces                       | 2018 | Viral transport medium | IZSVe19RS495-11            |
|               | Unclassified myotis $\alpha$ CoV      | <i>Myotis myotis</i>            | feces                       | 2016 | RNA later              | IZSVe21RS474-25            |
|               | Unclassified myotis $\alpha$ CoV      | <i>Myotis myotis</i>            | feces                       | 2016 | RNA later              | IZSVe21RS474-36            |
| $\beta$ -CoV  | Betacoronavirus 1_PHEV                | Pig                             | feces                       | 2018 | Dry                    | 18DIA90174-2               |
|               | Betacoronavirus 1_PHEV                | Pig                             | feces                       | 2018 | Dry                    | 18DIA90178-5               |
|               | Betacoronavirus 1_PHEV                | Pig                             | rectal swab                 | 2021 | RNA later              | IZSVe21RS1031-16           |
|               | Betacoronavirus 1_Bovine Coronavirus  | cow                             | viral strain (cell culture) |      |                        | Mebus                      |
|               | Betacoronavirus 1_Bovine Coronavirus  | <i>Tragelaphus spekii</i>       | feces                       | 2019 | Dry                    | IZSLER32286-1/2019         |
|               | Betacoronavirus 1_Bovine Coronavirus  | <i>Tragelaphus spekii</i>       | feces                       | 2019 | Dry                    | IZSLER32286-2/2019         |
|               | Murine Coronavirus                    | <i>Mus musculus</i>             | feces                       | 2021 | Dry                    | IZSVe21RS42-T              |
|               | Betacoronavirus Erinaceus             | <i>Erinaceus europaeum</i>      | intestine                   | 2021 | Dry                    | IZSVe21RS156-83            |
|               | Unclassified Eptesicus $\beta$ CoV    | <i>Eptesicus serotinus</i>      | feces                       | 2011 | Dry                    | ITA26_384_2012             |
|               | Unclassified Eidolon $\beta$ CoV      | <i>Eidolon helvum</i>           | feces                       | 2013 | Dry                    | 13RS452-71                 |
|               | Unclassified Eidolon $\beta$ CoV      | <i>Eidolon helvum</i>           | feces                       | 2013 | Dry                    | 13RS362-59                 |
|               | SARS-CoV-2                            | Dog                             | oral swab                   | 2020 | Dry                    | 20DIA30037-1/2020          |
|               | SARS-CoV-2                            | Human                           | viral strain (cell culture) |      |                        | 20VIR1935                  |
|               | SARS-CoV-2                            | Cat                             | nasal swab                  | 2020 | Dry                    | VE-IZSVe-20DIA30040-2/2020 |
| $\gamma$ -CoV | IBV                                   | Chicken                         | viral strain (egg culture)  |      |                        | IZSVe21RS156-64            |
|               | duck coronavirus                      | <i>Anas platyrhynchos</i>       | feces                       | 2018 | Dry                    | IZSLER138948-2/2018        |
|               | duck coronavirus                      | <i>Anas platyrhynchos</i>       | feces                       | 2019 | Dry                    | IZSLER288952-1/2019        |
| $\delta$ -CoV | quail coronavirus                     | <i>Coturnix japonica</i>        | intestine                   | 2019 | Dry                    | IZSLER335273/2019          |
|               | quail coronavirus                     | <i>Coturnix japonica</i>        | intestine                   | 2019 | Dry                    | IZSLER160792/2019          |
